# Supplementary material for: Immunolocalization of cyclotides in plant cells, tissues and organ supports their role in host defense
Source: PubMed Central journal article supplement (PMC5052299; doi:10.1007/s00425-016-2562-y), 2016-07-09

**Journal name:** PLANTA

**Article title:** Immunolocalization of cyclotides in plant cells, tissues and organs supports their role in host defense

**Authors:** Blazej Slazak<sup>1,2</sup>, Małgorzata Kapusta<sup>3</sup>, Sohaib Malik<sup>2</sup>, Jerzy Bohdanowicz<sup>3</sup>, Elżbieta Kuta<sup>4</sup>, Przemysław Malec<sup>5</sup>, Ulf Göransson<sup>2</sup>

**Affiliations:**

<sup>1</sup>W. Szafer Institute of Botany, Polish Academy of Science, 46 Lubicz St., 31-512 Cracow, Poland

<sup>2</sup>Division of Pharmacognosy, Department of Medicinal Chemistry, Uppsala University, Biomedical Center, Box 574, 751 23 Uppsala, Sweden

<sup>3</sup>Department of Plant Cytology and Embryology, Faculty of Biology, University of Gdańsk, 59 Wita Stwosza St., 80-308 Gdańsk, Poland

<sup>4</sup>Department of Plant Cytology and Embryology, Institute of Botany, Jagiellonian University, 9 Gronostajowa St., 30-387 Cracow, Poland

<sup>5</sup>Faculty of Biochemistry, Biophysics and Biotechnology; Jagiellonian University, 7 Gronostajowa St, 30-387 Cracow, Poland

**Corresponding author:** Blazej Slazak

<sup>1</sup>W. Szafer Institute of Botany, Polish Academy of Science, 46 Lubicz St., 31-512 Cracow, Poland

phone: +48 660 450 799

e-mail: b.slazak@botany.com

**Supplement 1.** Additional dot and western blot negative controls confirming the antibody's specificity. **a**, no signal (violet color reaction) can be detected on the membrane with blotted 2  $\mu$ g of ovalbumin and BSA. **b, c**, western blots stained with Ponceau S for whole blotted protein (**b**) and using the anti-cyO2 primary antibody and a secondary antibody conjugated with ALP (violet color reaction marked with arrowheads)(**c**). Lanes 1, 2, 3 and 4 correspond to *A. thaliana*, *N. benthamiana*, *V. uliginosa*, and pure cyO2, respectively.

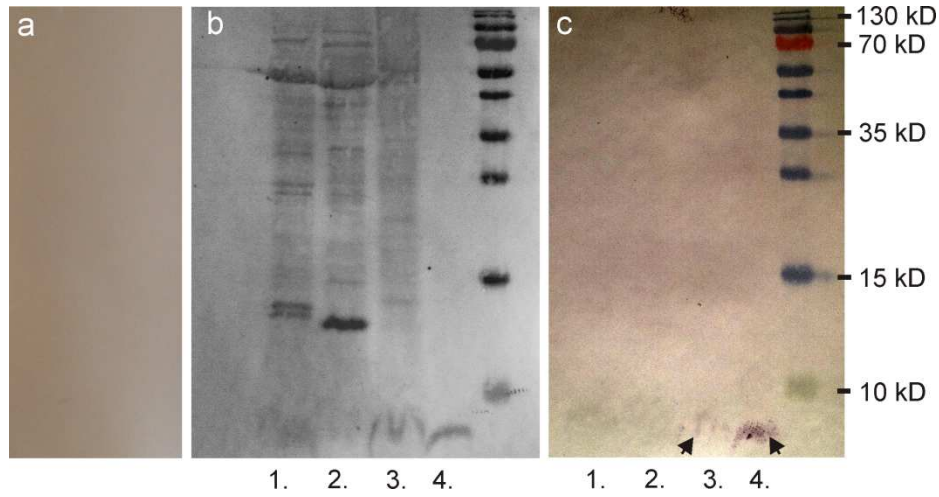

Supplement: 425_2016_2562_MOESM1_ESM.pdf [file 425_2016_2562_MOESM1_ESM.pdf]
